# Supplementary material for: Structural influences on the exchange coupling and zero-field splitting in the single-molecule magnet [MnIII6MnIII]3+
Source: Royal Society of Chemistry journal article supplement (doi:10.1039/c2dt31590d), 2012-01-01
Supplement: c2dt31590d.pdf [file c2dt31590d.pdf]

## Electronic Supplementary Information

### Structural Influences on the Exchange Coupling and Zero-Field Splitting in the Single-Molecule Magnet $[\text{Mn}^{\text{III}}_6\text{Mn}^{\text{III}}]^{3+}$

Veronika Hoeke,<sup>a</sup> Maik Heidemeier,<sup>a</sup> Erich Krickemeyer,<sup>a</sup> Anja Stammeler,<sup>a</sup> Hartmut Bögge,<sup>a</sup> Jürgen Schnack,<sup>b</sup> Thorsten Glaser<sup>\*a</sup>

<sup>a</sup> Lehrstuhl für Anorganische Chemie I, Fakultät für Chemie, Universität Bielefeld, Universitätsstr. 25, D-33615 Bielefeld, Germany

<sup>b</sup> Fakultät für Physik, Universität Bielefeld, Universitätsstr. 25, D-33615 Bielefeld, Germany

\* To whom correspondence should be addressed. E-mail: thorsten.glaser@uni-bielefeld.de (T.G.)

**Fig. S1.** Thermal ellipsoid plots of the two independent fragments ((a) and (b)) of  $[\text{Mn}^{\text{III}}_6\text{Mn}^{\text{III}}]^{3+}$  molecules in the asymmetric unit in crystals of **1** with the numbering scheme used. Thermal ellipsoids are drawn at the 50 % probability level; hydrogen atoms are omitted for clarity.

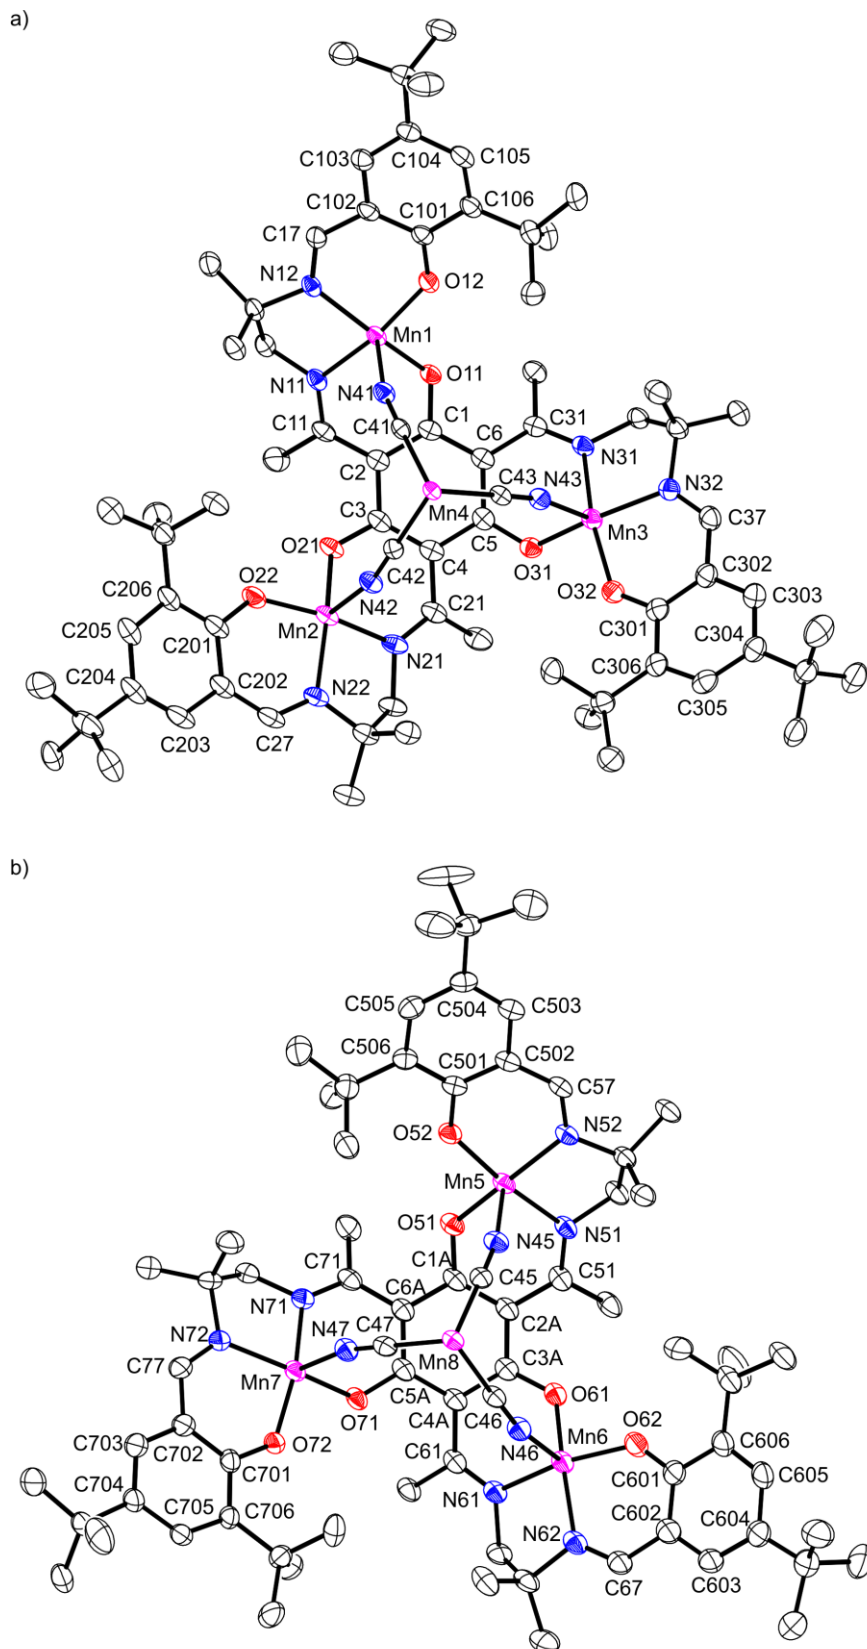

**Fig. S2.** Thermal ellipsoid plots of the two independent fragments ((a) and (b)) of  $[\text{Mn}^{\text{III}}_6\text{Mn}^{\text{III}}]^{3+}$  molecules in the asymmetric unit in crystals of **2** with the numbering scheme used. Thermal ellipsoids are drawn at the 50 % probability level; hydrogen atoms are omitted for clarity.

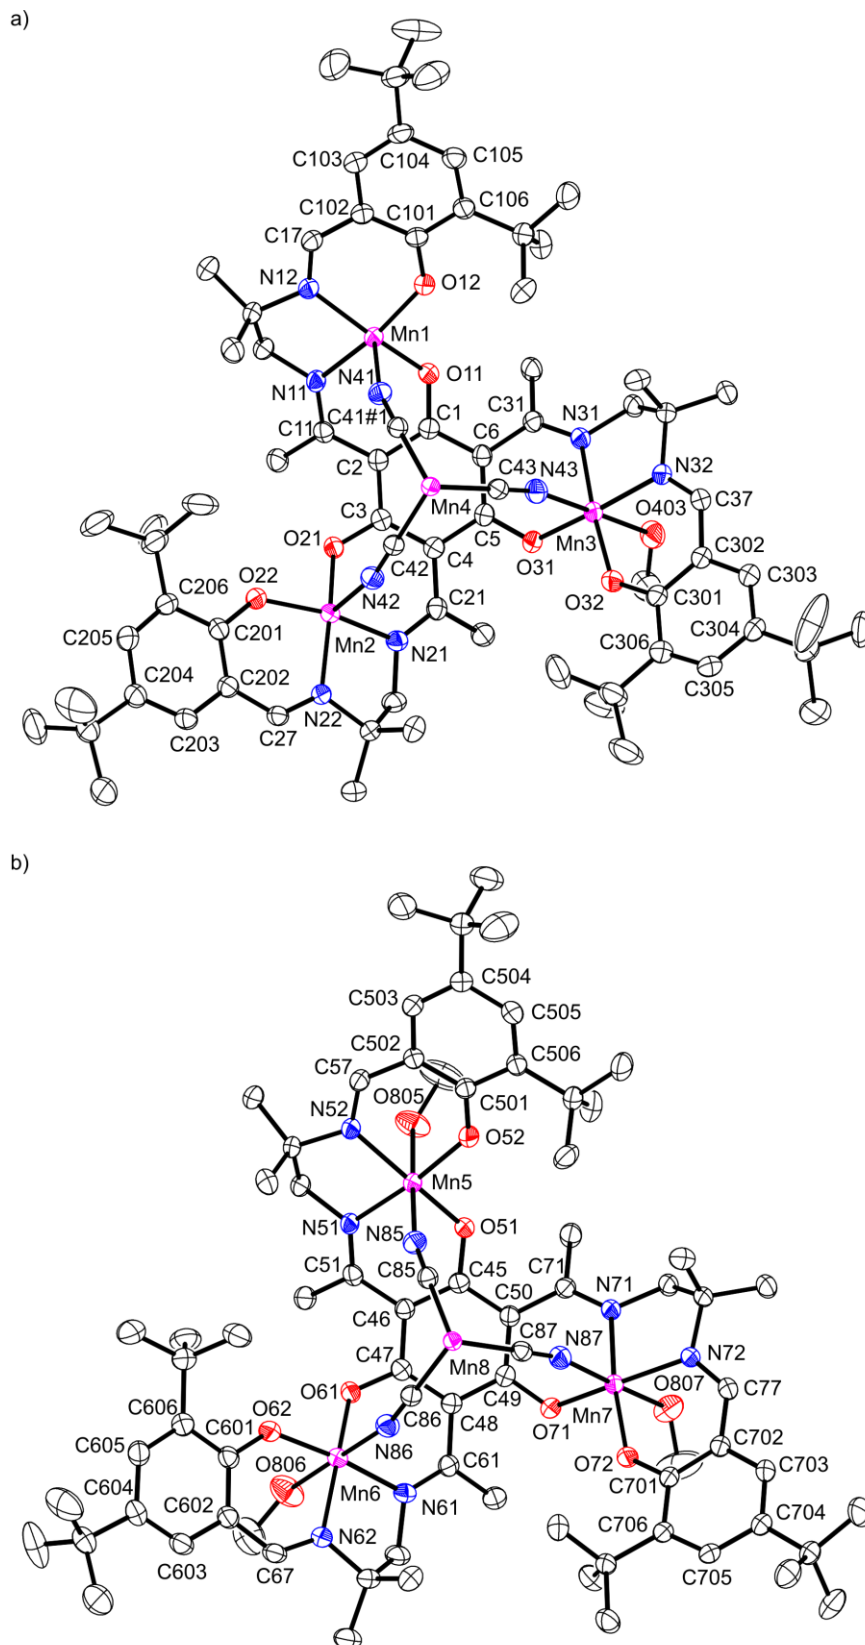

**Fig. S3.** Thermal ellipsoid plot of the fragment of the  $[\text{Mn}^{\text{III}}_6\text{Mn}^{\text{II}}]^{3+}$  molecule in the asymmetric unit in crystals of **3** with the numbering scheme used. Thermal ellipsoids are drawn at the 50 % probability level; hydrogen atoms are omitted for clarity.

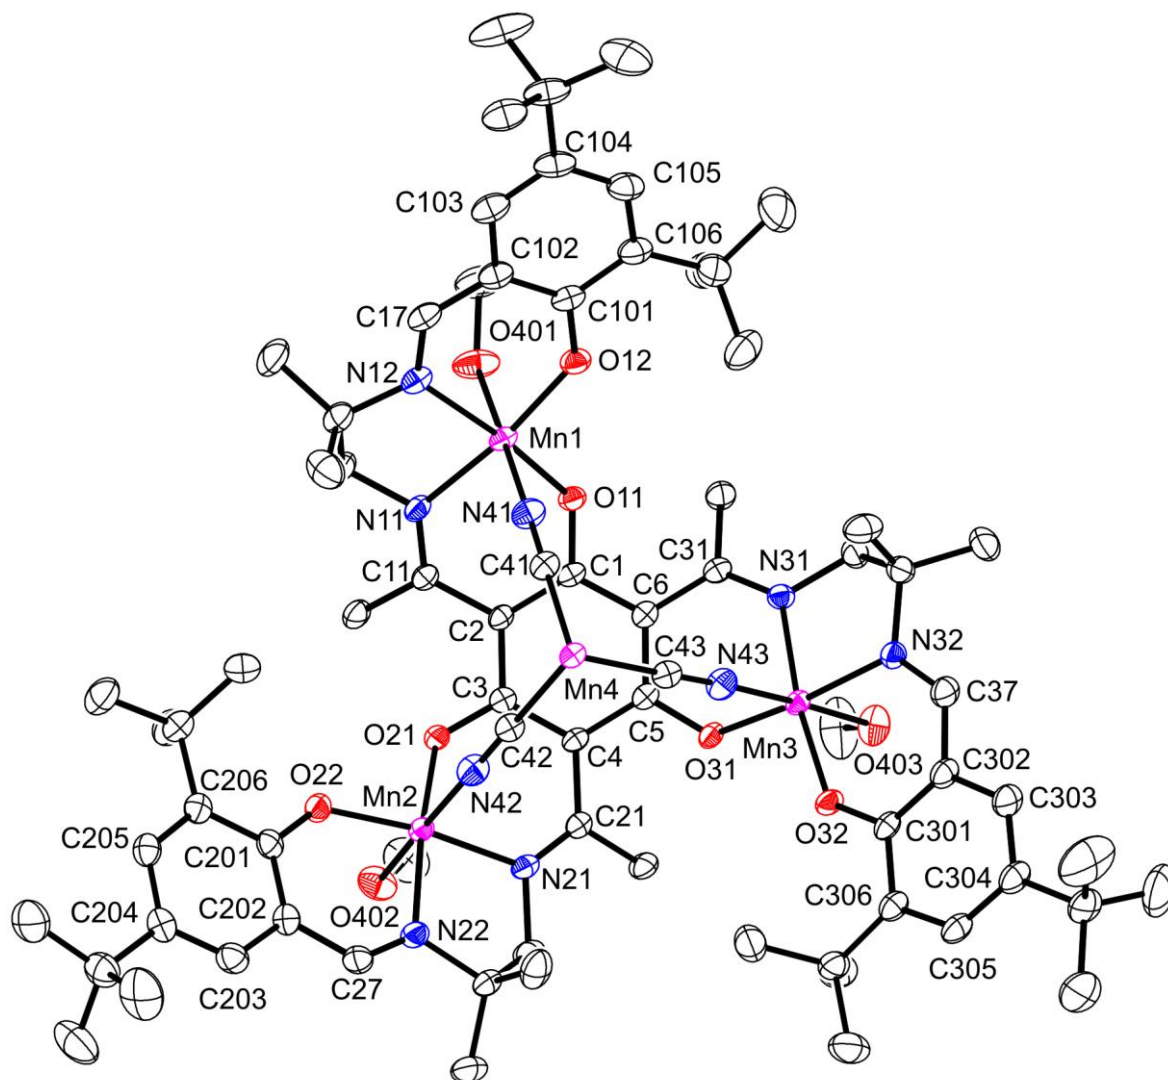

**Fig. S4.** Thermal ellipsoid plot of the fragment of the  $[\text{Mn}^{\text{III}}_6\text{Mn}^{\text{II}}]^{3+}$  molecule in the asymmetric unit in crystals of **4** with the numbering scheme used. Thermal ellipsoids are drawn at the 50 % probability level; hydrogen atoms are omitted for clarity.

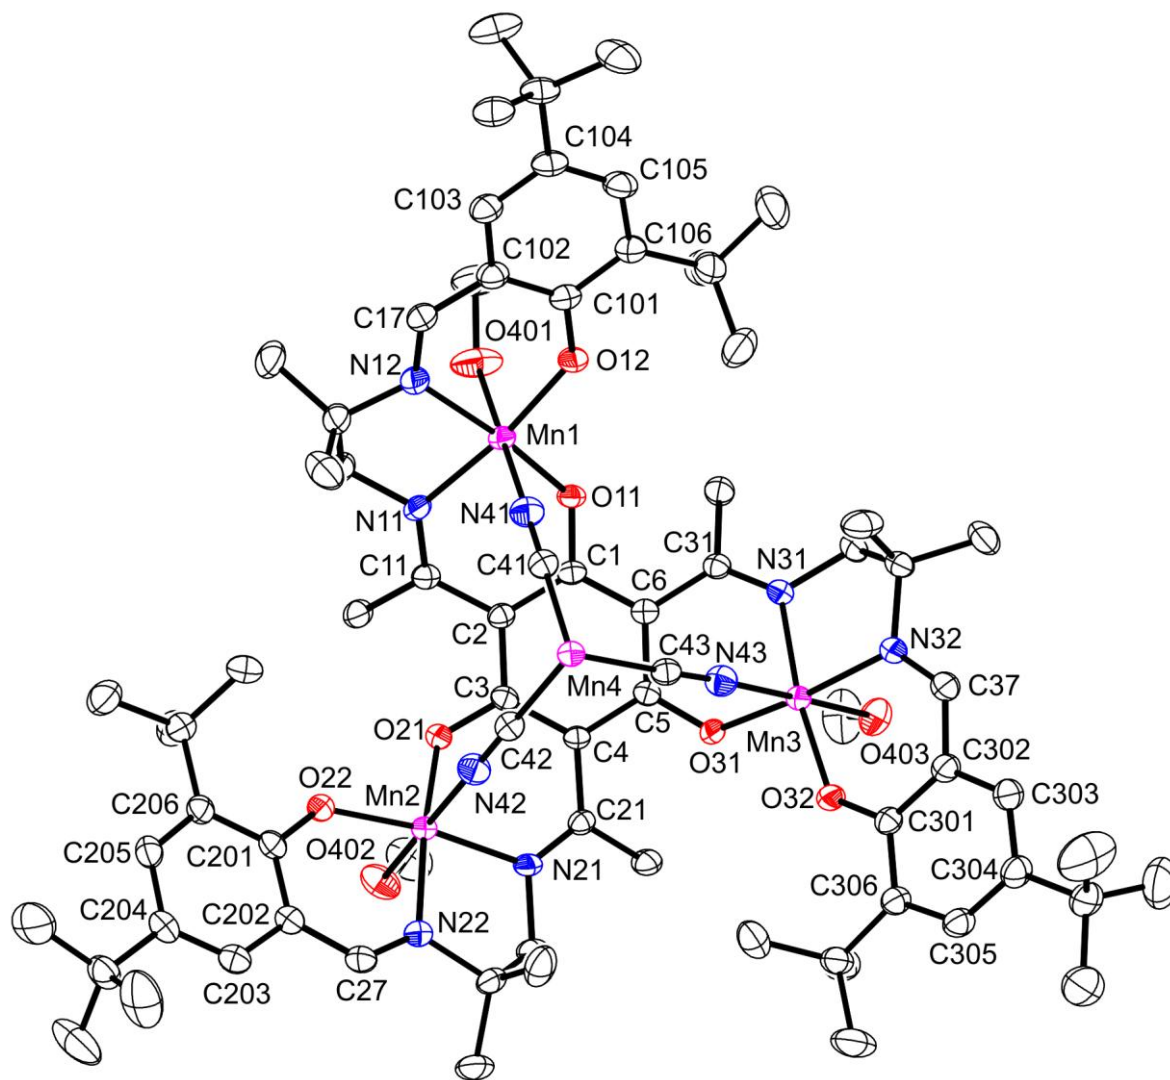

**Fig. S5.** Thermal ellipsoid plot of the fragment of the  $[\text{Mn}^{\text{III}}_6\text{Mn}^{\text{II}}]^{3+}$  molecule in the asymmetric unit in crystals of **5** with the numbering scheme used. Thermal ellipsoids are drawn at the 50 % probability level; hydrogen atoms are omitted for clarity.

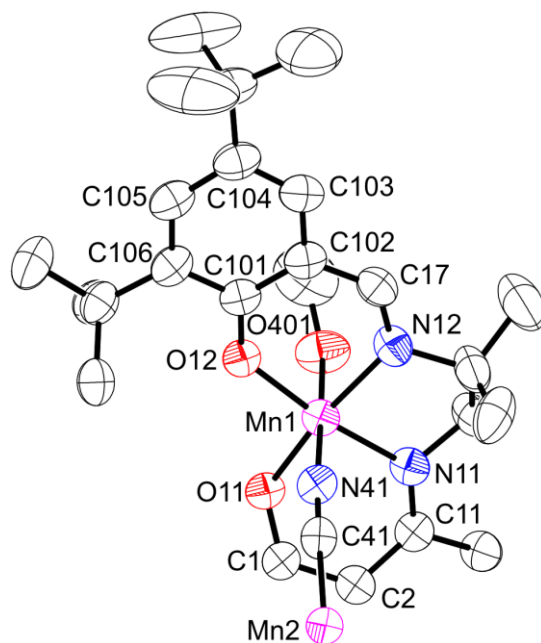

**Fig. S6.** Plots of the in-phase ( $\chi'_M$ ) and the out-of-phase ( $\chi''_M$ ) component of the AC susceptibility versus the temperature for **1** at zero DC field, with an AC field of 3 Oe oscillating at a frequency of 660 (orange), 1078 (blue), and 1488 Hz (black). Solid lines are a guide to the eye.

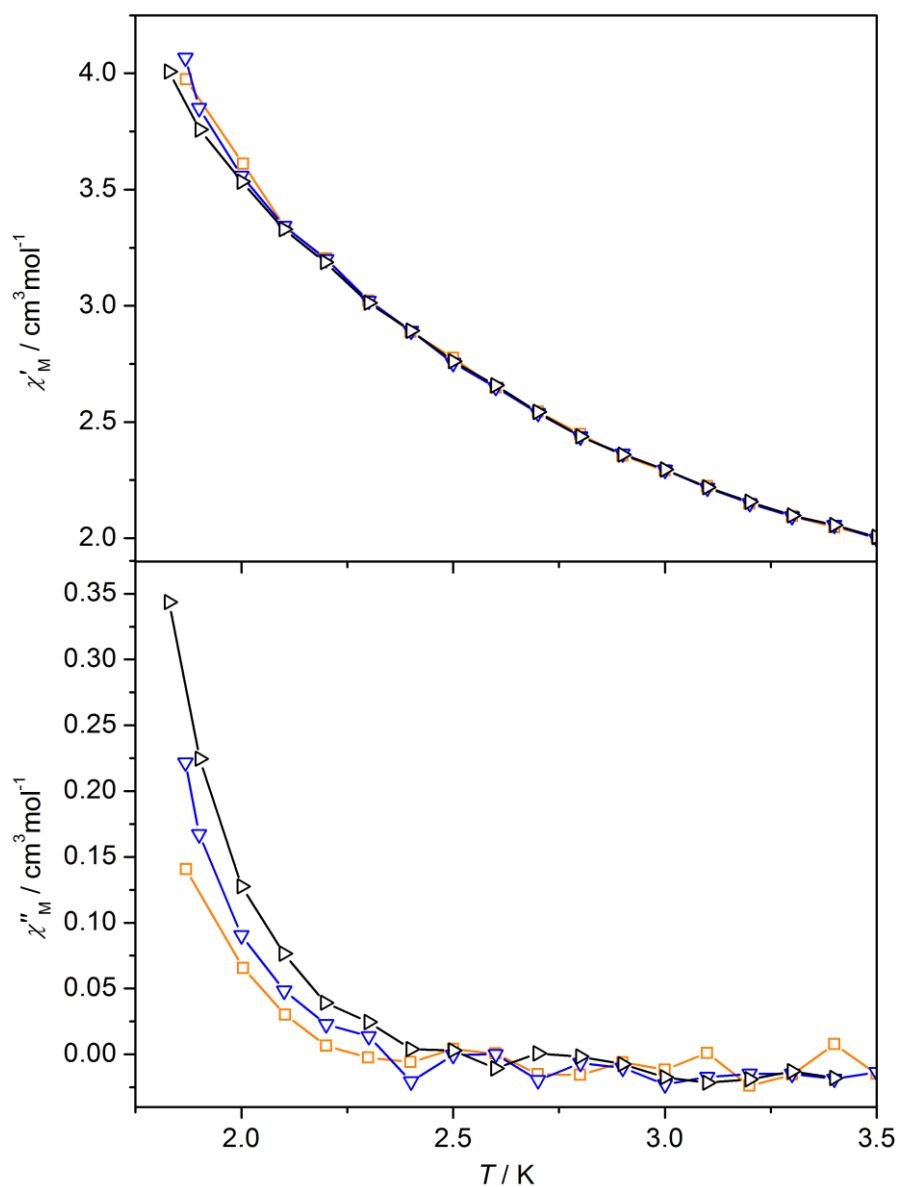

**Fig. S7.** Plots of the in-phase ( $\chi'_M$ ) and the out-of-phase ( $\chi''_M$ ) component of the AC susceptibility versus the temperature for **2** at zero DC field, with an AC field of 3 Oe oscillating at a frequency of 660 (orange), 1078 (blue), and 1488 Hz (black). Solid lines are a guide to the eye.

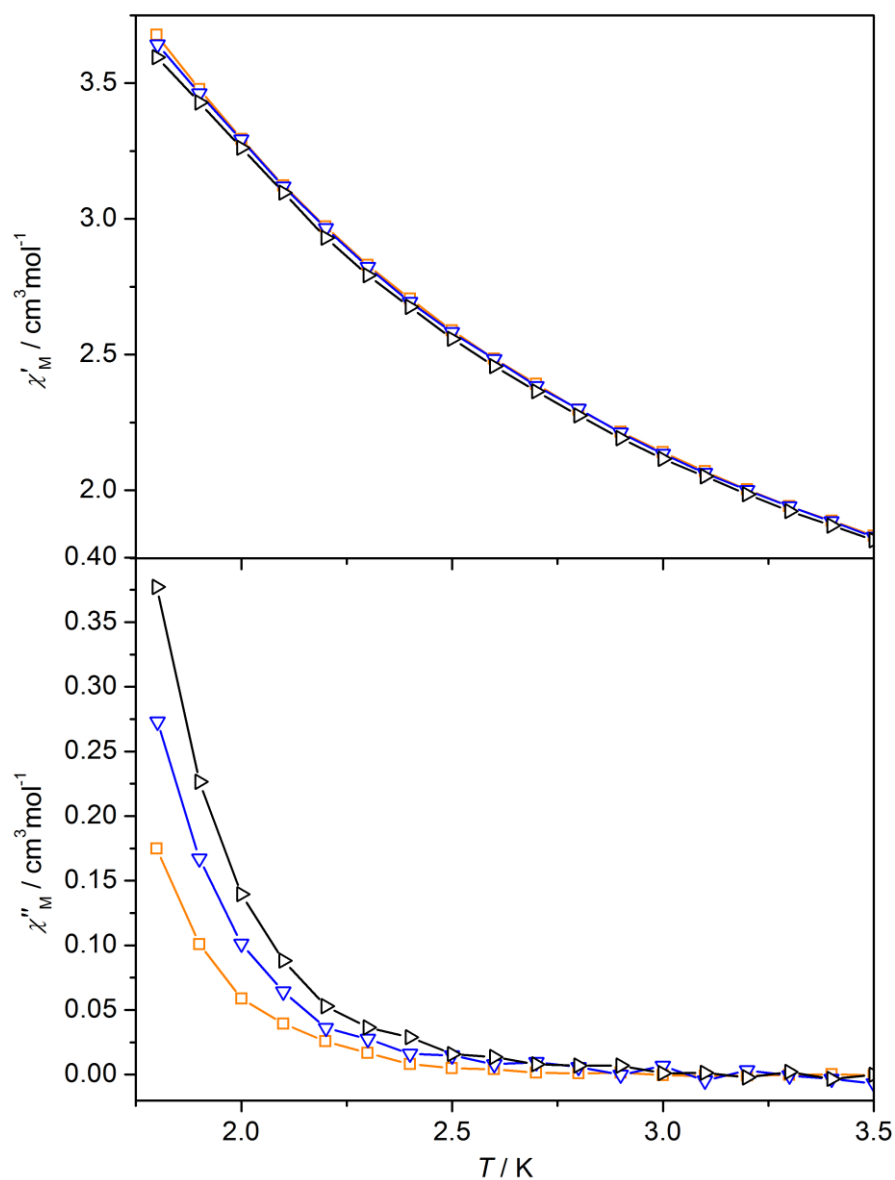



**Fig. S8.** Plots of the in-phase ( $\chi'_M$ ) and the out-of-phase ( $\chi''_M$ ) component of the AC susceptibility versus the temperature for **3** at zero DC field, with an AC field of 3 Oe oscillating at a frequency of 660 (orange), 1078 (blue), and 1488 Hz (black). Solid lines are a guide to the eye.

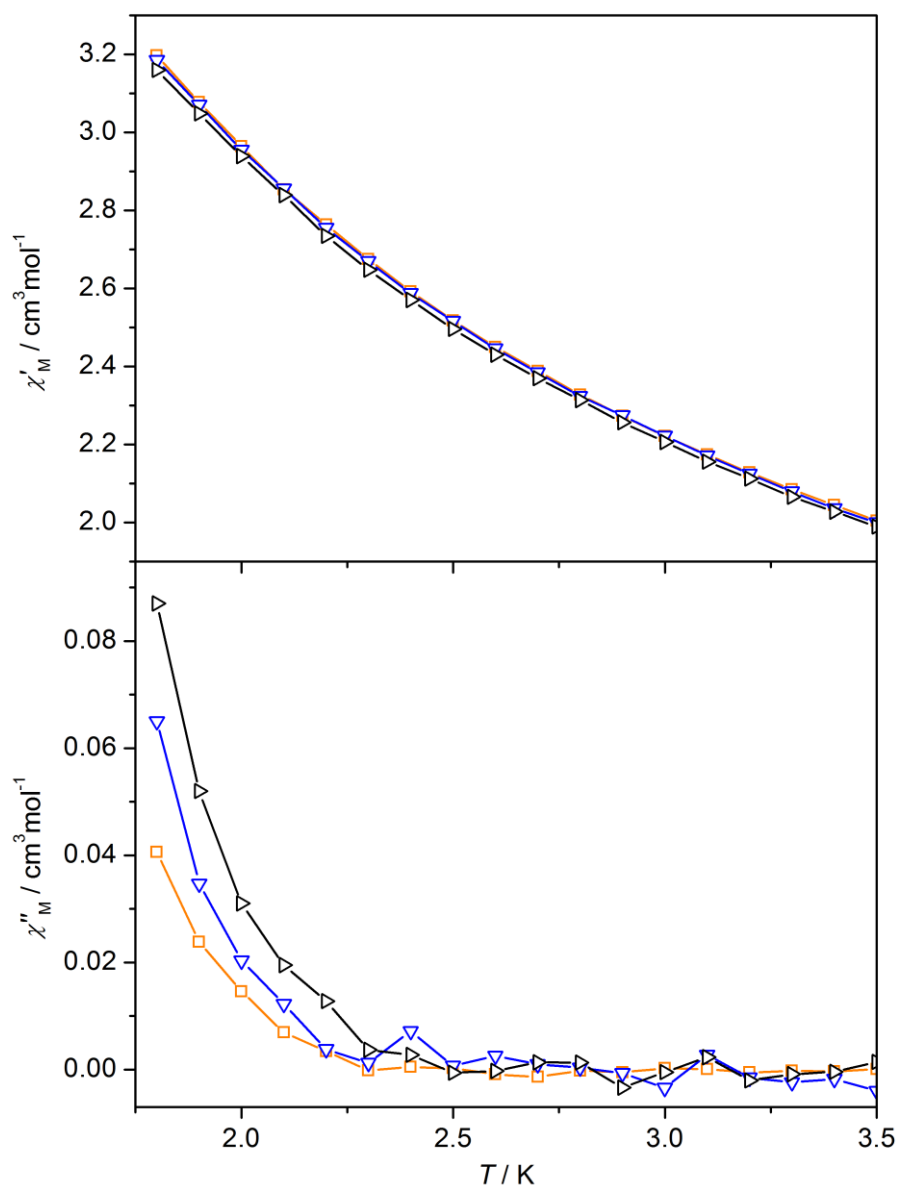

**Fig. S9.** Plots of the in-phase ( $\chi'_M$ ) and the out-of-phase ( $\chi''_M$ ) component of the AC susceptibility versus the temperature for **4** at zero DC field, with an AC field of 3 Oe oscillating at a frequency of 660 (orange), 1078 (blue), and 1488 Hz (black). Solid lines are a guide to the eye.

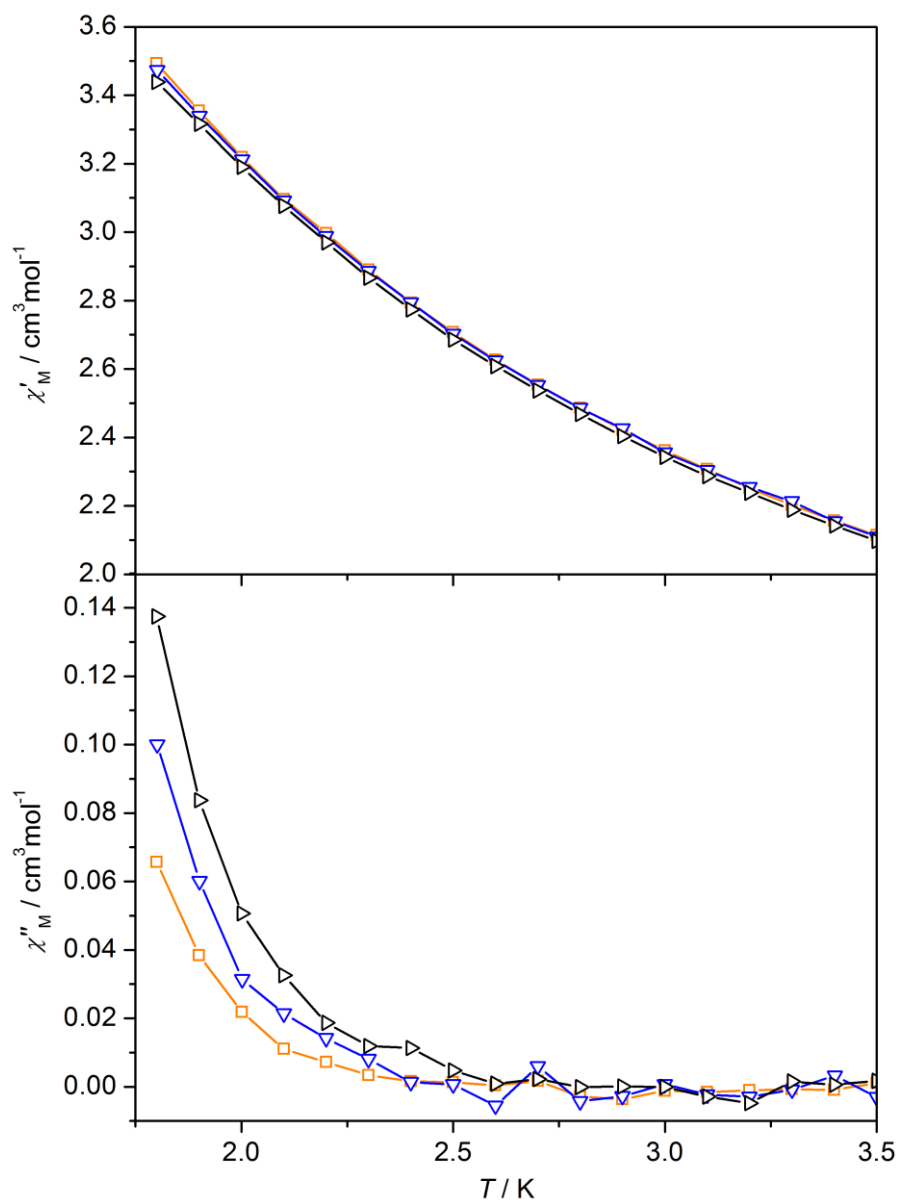

**Table S1.** Selected Interatomic Distances [Å] and Angles [deg] for **1**.

|               |            |               |           |
|---------------|------------|---------------|-----------|
| Mn(1)-O(11)   | 1.881(2)   | C(202)-C(203) | 1.404(4)  |
| Mn(1)-O(12)   | 1.8572(19) | C(203)-C(204) | 1.366(5)  |
| Mn(1)-N(11)   | 1.967(2)   | C(204)-C(205) | 1.401(5)  |
| Mn(1)-N(12)   | 1.978(2)   | C(205)-C(206) | 1.391(4)  |
| Mn(1)-N(41)   | 2.154(2)   | C(301)-C(302) | 1.410(4)  |
| Mn(2)-O(21)   | 1.8849(19) | C(301)-C(306) | 1.425(4)  |
| Mn(2)-O(22)   | 1.855(2)   | C(302)-C(303) | 1.407(4)  |
| Mn(2)-N(21)   | 1.959(3)   | C(303)-C(304) | 1.379(5)  |
| Mn(2)-N(22)   | 1.973(2)   | C(304)-C(305) | 1.407(5)  |
| Mn(2)-N(42)   | 2.130(2)   | C(305)-C(306) | 1.381(4)  |
| Mn(3)-O(31)   | 1.879(2)   | Mn(1)-Mn(2)   | 6.6629(6) |
| Mn(3)-O(32)   | 1.860(2)   | Mn(1)-Mn(3)   | 6.6468(7) |
| Mn(3)-N(31)   | 1.963(2)   | Mn(2)-Mn(3)   | 6.6300(7) |
| Mn(3)-N(32)   | 1.981(2)   | Mn(1)-Mn(4)   | 5.2203(5) |
| Mn(3)-N(43)   | 2.155(2)   | Mn(2)-Mn(4)   | 5.1626(5) |
| O(11)-C(1)    | 1.311(3)   | Mn(3)-Mn(4)   | 5.2312(5) |
| O(12)-C(101)  | 1.316(3)   | Mn(4)-C(41)   | 1.995(3)  |
| O(21)-C(3)    | 1.304(3)   | Mn(4)-C(42)   | 1.982(3)  |
| O(22)-C(201)  | 1.322(4)   | Mn(4)-C(43)   | 2.002(3)  |
| O(31)-C(5)    | 1.314(3)   | N(41)-C(41)   | 1.153(4)  |
| O(32)-C(301)  | 1.324(4)   | N(42)-C(42)   | 1.151(4)  |
| N(11)-C(11)   | 1.302(4)   | N(43)-C(43)   | 1.152(4)  |
| N(12)-C(17)   | 1.288(4)   | Mn(5)-O(51)   | 1.892(2)  |
| N(21)-C(21)   | 1.303(4)   | Mn(5)-O(52)   | 1.856(2)  |
| N(22)-C(27)   | 1.292(4)   | Mn(5)-N(51)   | 1.966(3)  |
| N(31)-C(31)   | 1.296(4)   | Mn(5)-N(52)   | 1.980(2)  |
| N(32)-C(37)   | 1.286(4)   | Mn(5)-N(45)   | 2.187(3)  |
| C(1)-C(2)     | 1.416(4)   | Mn(6)-O(61)   | 1.886(2)  |
| C(1)-C(6)     | 1.417(4)   | Mn(6)-O(62)   | 1.851(2)  |
| C(2)-C(3)     | 1.431(4)   | Mn(6)-N(61)   | 1.959(3)  |
| C(3)-C(4)     | 1.414(4)   | Mn(6)-N(62)   | 1.974(3)  |
| C(4)-C(5)     | 1.427(4)   | Mn(6)-N(46)   | 2.134(3)  |
| C(5)-C(6)     | 1.417(4)   | Mn(7)-O(71)   | 1.886(2)  |
| C(2)-C(11)    | 1.451(4)   | Mn(7)-O(72)   | 1.857(2)  |
| C(17)-C(102)  | 1.442(4)   | Mn(7)-N(71)   | 1.967(3)  |
| C(4)-C(21)    | 1.458(4)   | Mn(7)-N(72)   | 1.971(3)  |
| C(27)-C(202)  | 1.435(5)   | Mn(7)-N(47)   | 2.144(3)  |
| C(6)-C(31)    | 1.456(4)   | O(51)-C(1A)   | 1.311(4)  |
| C(37)-C(302)  | 1.433(4)   | O(52)-C(501)  | 1.327(3)  |
| C(101)-C(102) | 1.413(4)   | O(61)-C(3A)   | 1.310(4)  |
| C(101)-C(106) | 1.430(4)   | O(62)-C(601)  | 1.323(4)  |
| C(102)-C(103) | 1.405(4)   | O(71)-C(5A)   | 1.310(3)  |
| C(103)-C(104) | 1.368(4)   | O(72)-C(701)  | 1.327(4)  |
| C(104)-C(105) | 1.413(4)   | N(51)-C(51)   | 1.303(4)  |
| C(105)-C(106) | 1.377(4)   | N(52)-C(57)   | 1.284(4)  |
| C(201)-C(202) | 1.416(4)   | N(61)-C(61)   | 1.294(4)  |
| C(201)-C(206) | 1.418(5)   | N(62)-C(67)   | 1.289(4)  |
|               |            | N(71)-C(71)   | 1.301(4)  |
|               |            | N(72)-C(77)   | 1.292(4)  |
|               |            | C(1A)-C(2A)   | 1.416(4)  |
|               |            | C(1A)-C(6A)   | 1.426(4)  |

|                   |           |                    |            |
|-------------------|-----------|--------------------|------------|
| C(2A)-C(3A)       | 1.425(4)  | O(22)-Mn(2)-O(21)  | 91.43(9)   |
| C(3A)-C(4A)       | 1.419(4)  | O(22)-Mn(2)-N(21)  | 167.15(10) |
| C(4A)-C(5A)       | 1.416(4)  | O(21)-Mn(2)-N(21)  | 89.50(10)  |
| C(5A)-C(6A)       | 1.418(4)  | O(22)-Mn(2)-N(22)  | 91.92(10)  |
| C(2A)-C(51)       | 1.458(4)  | O(21)-Mn(2)-N(22)  | 160.81(9)  |
| C(57)-C(502)      | 1.436(4)  | N(21)-Mn(2)-N(22)  | 83.15(10)  |
| C(4A)-C(61)       | 1.461(4)  | O(22)-Mn(2)-N(42)  | 96.88(10)  |
| C(67)-C(602)      | 1.438(5)  | O(21)-Mn(2)-N(42)  | 95.06(9)   |
| C(6A)-C(71)       | 1.459(4)  | N(21)-Mn(2)-N(42)  | 95.80(10)  |
| C(77)-C(702)      | 1.432(5)  | N(22)-Mn(2)-N(42)  | 103.29(10) |
| C(501)-C(502)     | 1.416(4)  | O(32)-Mn(3)-O(31)  | 91.98(9)   |
| C(501)-C(506)     | 1.411(4)  | O(32)-Mn(3)-N(31)  | 166.20(9)  |
| C(502)-C(503)     | 1.407(4)  | O(31)-Mn(3)-N(31)  | 88.71(9)   |
| C(503)-C(504)     | 1.378(5)  | O(32)-Mn(3)-N(32)  | 91.30(10)  |
| C(504)-C(505)     | 1.406(5)  | O(31)-Mn(3)-N(32)  | 157.88(9)  |
| C(505)-C(506)     | 1.390(4)  | N(31)-Mn(3)-N(32)  | 83.05(10)  |
| C(601)-C(602)     | 1.410(5)  | O(32)-Mn(3)-N(43)  | 96.97(9)   |
| C(601)-C(606)     | 1.423(5)  | O(31)-Mn(3)-N(43)  | 94.14(9)   |
| C(602)-C(603)     | 1.404(5)  | N(31)-Mn(3)-N(43)  | 96.73(9)   |
| C(603)-C(604)     | 1.376(5)  | N(32)-Mn(3)-N(43)  | 107.16(10) |
| C(604)-C(605)     | 1.405(5)  | Mn(4)-Mn(1)-Mn(2)  | 49.700(6)  |
| C(605)-C(606)     | 1.379(5)  | Mn(4)-Mn(1)-Mn(3)  | 50.581(6)  |
| C(701)-C(702)     | 1.409(4)  | Mn(4)-Mn(2)-Mn(1)  | 50.462(6)  |
| C(701)-C(706)     | 1.418(4)  | Mn(4)-Mn(2)-Mn(3)  | 50.825(6)  |
| C(702)-C(703)     | 1.408(5)  | Mn(4)-Mn(3)-Mn(1)  | 50.436(6)  |
| C(703)-C(704)     | 1.376(5)  | Mn(4)-Mn(3)-Mn(2)  | 49.911(6)  |
| C(704)-C(705)     | 1.412(4)  | Mn(3)-Mn(1)-Mn(2)  | 59.752(7)  |
| C(705)-C(706)     | 1.388(4)  | Mn(3)-Mn(2)-Mn(1)  | 60.003(7)  |
| Mn(5)-Mn(6)       | 6.7208(7) | Mn(2)-Mn(3)-Mn(1)  | 60.244(7)  |
| Mn(5)-Mn(7)       | 6.6376(7) | C(1)-O(11)-Mn(1)   | 122.23(17) |
| Mn(6)-Mn(7)       | 6.6801(7) | C(101)-O(12)-Mn(1) | 131.17(18) |
| Mn(5)-Mn(8)       | 5.2721(5) | C(3)-O(21)-Mn(2)   | 122.62(18) |
| Mn(6)-Mn(8)       | 5.1822(5) | C(201)-O(22)-Mn(2) | 131.3(2)   |
| Mn(7)-Mn(8)       | 5.2055(5) | C(5)-O(31)-Mn(3)   | 121.59(17) |
| Mn(8)-C(45)       | 1.999(3)  | C(301)-O(32)-Mn(3) | 130.73(19) |
| Mn(8)-C(46)       | 1.988(3)  | C(41)-Mn(4)-C(43)  | 89.79(11)  |
| Mn(8)-C(47)       | 1.993(3)  | C(42)-Mn(4)-C(41)  | 90.43(11)  |
| N(45)-C(45)       | 1.152(4)  | C(42)-Mn(4)-C(43)  | 90.06(11)  |
| N(46)-C(46)       | 1.156(4)  | Mn(1)-Mn(4)-Mn(3)  | 78.983(8)  |
| N(47)-C(47)       | 1.148(4)  | Mn(2)-Mn(4)-Mn(1)  | 79.838(8)  |
|                   |           | Mn(2)-Mn(4)-Mn(3)  | 79.264(8)  |
| O(12)-Mn(1)-O(11) | 92.74(9)  | C(41)-N(41)-Mn(1)  | 160.4(2)   |
| O(12)-Mn(1)-N(11) | 166.70(9) | C(42)-N(42)-Mn(2)  | 157.7(2)   |
| O(11)-Mn(1)-N(11) | 88.32(9)  | C(43)-N(43)-Mn(3)  | 160.9(2)   |
| O(12)-Mn(1)-N(12) | 92.02(9)  | N(41)-C(41)-Mn(4)  | 178.4(2)   |
| O(11)-Mn(1)-N(12) | 160.34(9) | N(42)-C(42)-Mn(4)  | 179.2(3)   |
| N(11)-Mn(1)-N(12) | 82.79(10) | N(43)-C(43)-Mn(4)  | 178.7(3)   |
| O(12)-Mn(1)-N(41) | 97.18(9)  | O(52)-Mn(5)-O(51)  | 94.48(9)   |
| O(11)-Mn(1)-N(41) | 94.42(9)  | O(52)-Mn(5)-N(51)  | 172.31(10) |
| N(11)-Mn(1)-N(41) | 95.96(9)  | O(51)-Mn(5)-N(51)  | 88.62(10)  |
| N(12)-Mn(1)-N(41) | 103.88(9) | O(52)-Mn(5)-N(52)  | 92.20(10)  |

O(51)-Mn(5)-N(52) 164.03(10)  
N(51)-Mn(5)-N(52) 83.09(10)  
O(52)-Mn(5)-N(45) 94.02(10)  
O(51)-Mn(5)-N(45) 93.34(9)  
N(51)-Mn(5)-N(45) 92.82(10)  
N(52)-Mn(5)-N(45) 100.66(10)  
O(62)-Mn(6)-O(61) 91.63(10)  
O(62)-Mn(6)-N(61) 163.92(10)  
O(61)-Mn(6)-N(61) 89.38(10)  
O(62)-Mn(6)-N(62) 90.89(11)  
O(61)-Mn(6)-N(62) 161.09(10)  
N(61)-Mn(6)-N(62) 83.14(11)  
O(62)-Mn(6)-N(46) 99.80(10)  
O(61)-Mn(6)-N(46) 93.79(10)  
N(61)-Mn(6)-N(46) 96.14(10)  
N(62)-Mn(6)-N(46) 104.24(10)  
O(72)-Mn(7)-O(71) 92.99(9)  
O(72)-Mn(7)-N(71) 165.69(10)  
O(71)-Mn(7)-N(71) 88.14(10)  
O(72)-Mn(7)-N(72) 91.72(10)  
O(71)-Mn(7)-N(72) 160.17(11)  
N(71)-Mn(7)-N(72) 82.68(11)  
O(72)-Mn(7)-N(47) 96.68(10)  
O(71)-Mn(7)-N(47) 93.84(9)  
N(71)-Mn(7)-N(47) 97.47(10)  
N(72)-Mn(7)-N(47) 104.73(11)  
Mn(8)-Mn(5)-Mn(6) 49.409(6)  
Mn(8)-Mn(5)-Mn(7) 50.247(6)  
Mn(8)-Mn(6)-Mn(5) 50.582(6)  
Mn(8)-Mn(6)-Mn(7) 50.131(6)  
Mn(8)-Mn(7)-Mn(5) 51.137(6)  
Mn(8)-Mn(7)-Mn(6) 49.826(6)  
Mn(7)-Mn(5)-Mn(6) 60.004(8)  
Mn(7)-Mn(6)-Mn(5) 59.379(7)  
Mn(5)-Mn(7)-Mn(6) 60.616(7)  
C(1A)-O(51)-Mn(5) 121.80(19)  
C(501)-O(52)-Mn(5) 131.8(2)  
C(3A)-O(61)-Mn(6) 123.11(19)  
C(601)-O(62)-Mn(6) 131.3(2)  
C(5A)-O(71)-Mn(7) 122.12(18)  
C(701)-O(72)-Mn(7) 131.31(19)  
C(46)-Mn(8)-C(45) 90.28(11)  
C(46)-Mn(8)-C(47) 91.32(12)  
C(47)-Mn(8)-C(45) 88.68(12)  
Mn(6)-Mn(8)-Mn(5) 80.008(8)  
Mn(6)-Mn(8)-Mn(7) 80.042(8)  
Mn(7)-Mn(8)-Mn(5) 78.616(8)  
C(45)-N(45)-Mn(5) 162.8(2)  
C(46)-N(46)-Mn(6) 158.3(3)  
C(47)-N(47)-Mn(7) 160.2(2)  
N(45)-C(45)-Mn(8) 178.4(3)

N(46)-C(46)-Mn(8) 178.8(3)  
N(47)-C(47)-Mn(8) 179.2(3)

---

Symmetry transformations used to  
generate equivalent atoms:

#1 -x+2,-y+1,-z+1 #2 -x,-y+2,-z+2

**Table S2.** Selected Interatomic Distances [Å] and Angles [deg] for **2**.

|               |            |               |            |
|---------------|------------|---------------|------------|
| Mn(1)-O(11)   | 1.8823(16) | C(201)-C(206) | 1.425(3)   |
| Mn(1)-O(12)   | 1.8671(16) | C(202)-C(203) | 1.408(3)   |
| Mn(1)-N(11)   | 1.9641(18) | C(203)-C(204) | 1.372(3)   |
| Mn(1)-N(12)   | 1.9826(19) | C(204)-C(205) | 1.403(3)   |
| Mn(1)-N(41)   | 2.1412(19) | C(205)-C(206) | 1.382(3)   |
| Mn(2)-O(21)   | 1.8852(15) | C(301)-C(302) | 1.419(3)   |
| Mn(2)-O(22)   | 1.8602(16) | C(301)-C(306) | 1.424(3)   |
| Mn(2)-N(21)   | 1.9628(19) | C(302)-C(303) | 1.406(3)   |
| Mn(2)-N(22)   | 1.9817(19) | C(303)-C(304) | 1.371(4)   |
| Mn(2)-N(42)   | 2.137(2)   | C(304)-C(305) | 1.401(4)   |
| Mn(3)-O(31)   | 1.8980(15) | C(305)-C(306) | 1.383(4)   |
| Mn(3)-O(32)   | 1.8723(16) | Mn(1)-Mn(2)   | 6.6368(5)  |
| Mn(3)-N(31)   | 1.9711(19) | Mn(1)-Mn(3)   | 6.6604(5)  |
| Mn(3)-N(32)   | 1.9848(18) | Mn(2)-Mn(3)   | 6.6891(5)  |
| Mn(3)-N(43)   | 2.230(2)   | Mn(1)-Mn(4)   | 5.1923(4)  |
| Mn(3)-O(403)  | 2.3139(18) | Mn(2)-Mn(4)   | 5.1882(3)  |
| O(11)-C(1)    | 1.311(3)   | Mn(3)-Mn(4)   | 5.3149(4)  |
| O(12)-C(101)  | 1.319(3)   | Mn(4)-C(41)#1 | 1.987(2)   |
| O(21)-C(3)    | 1.317(3)   | Mn(4)-C(42)   | 1.988(2)   |
| O(22)-C(201)  | 1.321(3)   | Mn(4)-C(43)   | 1.998(2)   |
| O(31)-C(5)    | 1.312(3)   | N(41)-C(41)#1 | 1.152(3)   |
| O(32)-C(301)  | 1.313(3)   | N(42)-C(42)   | 1.152(3)   |
| N(11)-C(11)   | 1.303(3)   | N(43)-C(43)   | 1.151(3)   |
| N(12)-C(17)   | 1.290(3)   | Mn(5)-O(51)   | 1.8881(16) |
| N(21)-C(21)   | 1.305(3)   | Mn(5)-O(52)   | 1.8674(15) |
| N(22)-C(27)   | 1.289(3)   | Mn(5)-N(51)   | 1.9653(18) |
| N(31)-C(31)   | 1.302(3)   | Mn(5)-N(52)   | 1.9921(19) |
| N(32)-C(37)   | 1.282(3)   | Mn(5)-N(85)   | 2.2417(19) |
| C(1)-C(2)     | 1.419(3)   | Mn(5)-O(805)  | 2.3886(19) |
| C(1)-C(6)     | 1.425(3)   | Mn(6)-O(61)   | 1.8943(15) |
| C(2)-C(3)     | 1.424(3)   | Mn(6)-O(62)   | 1.8599(16) |
| C(3)-C(4)     | 1.416(3)   | Mn(6)-N(61)   | 1.9628(19) |
| C(4)-C(5)     | 1.432(3)   | Mn(6)-N(62)   | 1.9903(19) |
| C(5)-C(6)     | 1.409(3)   | Mn(6)-N(86)   | 2.2009(19) |
| C(2)-C(11)    | 1.460(3)   | Mn(6)-O(806)  | 2.394(2)   |
| C(17)-C(102)  | 1.435(3)   | Mn(7)-O(71)   | 1.8860(15) |
| C(4)-C(21)    | 1.455(3)   | Mn(7)-O(72)   | 1.8650(15) |
| C(27)-C(202)  | 1.433(3)   | Mn(7)-N(71)   | 1.9644(18) |
| C(6)-C(31)    | 1.462(3)   | Mn(7)-N(72)   | 1.9845(18) |
| C(37)-C(302)  | 1.438(3)   | Mn(7)-N(87)   | 2.214(2)   |
| C(101)-C(102) | 1.417(3)   | Mn(7)-O(807)  | 2.496(2)   |
| C(101)-C(106) | 1.428(3)   | O(51)-C(45)   | 1.308(3)   |
| C(102)-C(103) | 1.410(3)   | O(52)-C(501)  | 1.309(3)   |
| C(103)-C(104) | 1.371(4)   | O(61)-C(47)   | 1.309(3)   |
| C(104)-C(105) | 1.415(3)   | O(62)-C(601)  | 1.315(3)   |
| C(105)-C(106) | 1.377(3)   | O(71)-C(49)   | 1.316(3)   |
| C(201)-C(202) | 1.413(3)   | O(72)-C(701)  | 1.319(3)   |
|               |            | N(51)-C(51)   | 1.298(3)   |
|               |            | N(52)-C(57)   | 1.284(3)   |
|               |            | N(61)-C(61)   | 1.301(3)   |
|               |            | N(62)-C(67)   | 1.289(3)   |

|                   |           |                     |            |
|-------------------|-----------|---------------------|------------|
| N(71)-C(71)       | 1.300(3)  | O(12)-Mn(1)-N(41)   | 94.53(7)   |
| N(72)-C(77)       | 1.288(3)  | O(11)-Mn(1)-N(41)   | 96.10(7)   |
| C(45)-C(46)       | 1.417(3)  | N(11)-Mn(1)-N(41)   | 95.48(8)   |
| C(45)-C(50)       | 1.422(3)  | N(12)-Mn(1)-N(41)   | 103.74(8)  |
| C(46)-C(47)       | 1.431(3)  | O(22)-Mn(2)-O(21)   | 92.60(7)   |
| C(47)-C(48)       | 1.419(3)  | O(22)-Mn(2)-N(21)   | 163.64(8)  |
| C(48)-C(49)       | 1.419(3)  | O(21)-Mn(2)-N(21)   | 87.92(7)   |
| C(49)-C(50)       | 1.413(3)  | O(22)-Mn(2)-N(22)   | 91.24(7)   |
| C(46)-C(51)       | 1.461(3)  | O(21)-Mn(2)-N(22)   | 158.77(7)  |
| C(57)-C(502)      | 1.447(3)  | N(21)-Mn(2)-N(22)   | 82.65(8)   |
| C(48)-C(61)       | 1.462(3)  | O(22)-Mn(2)-N(42)   | 98.24(8)   |
| C(67)-C(602)      | 1.439(3)  | O(21)-Mn(2)-N(42)   | 95.44(7)   |
| C(50)-C(71)       | 1.464(3)  | N(21)-Mn(2)-N(42)   | 97.98(8)   |
| C(77)-C(702)      | 1.437(3)  | N(22)-Mn(2)-N(42)   | 104.65(8)  |
| C(501)-C(502)     | 1.418(3)  | O(32)-Mn(3)-O(31)   | 94.90(7)   |
| C(501)-C(506)     | 1.433(3)  | O(32)-Mn(3)-N(31)   | 174.90(7)  |
| C(502)-C(503)     | 1.408(3)  | O(31)-Mn(3)-N(31)   | 89.02(7)   |
| C(503)-C(504)     | 1.374(3)  | O(32)-Mn(3)-N(32)   | 92.91(7)   |
| C(504)-C(505)     | 1.407(3)  | O(31)-Mn(3)-N(32)   | 168.05(7)  |
| C(505)-C(506)     | 1.382(3)  | N(31)-Mn(3)-N(32)   | 82.72(8)   |
| C(601)-C(602)     | 1.416(3)  | O(32)-Mn(3)-N(43)   | 91.14(8)   |
| C(601)-C(606)     | 1.423(3)  | O(31)-Mn(3)-N(43)   | 91.67(7)   |
| C(602)-C(603)     | 1.411(3)  | N(31)-Mn(3)-N(43)   | 92.02(8)   |
| C(603)-C(604)     | 1.377(4)  | N(32)-Mn(3)-N(43)   | 97.21(8)   |
| C(604)-C(605)     | 1.405(4)  | O(32)-Mn(3)-O(403)  | 88.56(7)   |
| C(605)-C(606)     | 1.378(3)  | O(31)-Mn(3)-O(403)  | 88.17(7)   |
| C(701)-C(702)     | 1.413(3)  | N(31)-Mn(3)-O(403)  | 88.29(8)   |
| C(701)-C(706)     | 1.426(3)  | N(32)-Mn(3)-O(403)  | 82.98(7)   |
| C(702)-C(703)     | 1.414(3)  | N(43)-Mn(3)-O(403)  | 179.65(8)  |
| C(703)-C(704)     | 1.372(3)  | Mn(4)-Mn(1)-Mn(2)   | 50.229(4)  |
| C(704)-C(705)     | 1.408(3)  | Mn(4)-Mn(1)-Mn(3)   | 51.482(5)  |
| C(705)-C(706)     | 1.387(3)  | Mn(4)-Mn(2)-Mn(1)   | 50.284(4)  |
| Mn(5)-Mn(6)       | 6.6856(5) | Mn(4)-Mn(2)-Mn(3)   | 51.283(5)  |
| Mn(5)-Mn(7)       | 6.6867(5) | Mn(4)-Mn(3)-Mn(1)   | 49.852(4)  |
| Mn(6)-Mn(7)       | 6.7051(5) | Mn(4)-Mn(3)-Mn(2)   | 49.609(4)  |
| Mn(5)-Mn(8)       | 5.3390(3) | Mn(2)-Mn(1)-Mn(3)   | 60.403(6)  |
| Mn(6)-Mn(8)       | 5.2756(4) | Mn(1)-Mn(2)-Mn(3)   | 59.973(5)  |
| Mn(7)-Mn(8)       | 5.2974(4) | Mn(1)-Mn(3)-Mn(2)   | 59.624(5)  |
| Mn(8)-C(85)       | 2.017(2)  | C(1)-O(11)-Mn(1)    | 121.63(13) |
| Mn(8)-C(86)       | 1.995(2)  | C(101)-O(12)-Mn(1)  | 131.83(14) |
| Mn(8)-C(87)       | 2.003(2)  | C(3)-O(21)-Mn(2)    | 121.96(14) |
| N(85)-C(85)       | 1.149(3)  | C(201)-O(22)-Mn(2)  | 131.96(15) |
| N(86)-C(86)       | 1.155(3)  | C(5)-O(31)-Mn(3)    | 122.36(14) |
| N(87)-C(87)       | 1.154(3)  | C(301)-O(32)-Mn(3)  | 130.64(15) |
| O(12)-Mn(1)-O(11) | 94.16(7)  | C(41)#1-Mn(4)-C(42) | 89.62(9)   |
| O(12)-Mn(1)-N(11) | 169.46(7) | C(41)#1-Mn(4)-C(43) | 89.35(9)   |
| O(11)-Mn(1)-N(11) | 88.03(7)  | C(42)-Mn(4)-C(43)   | 89.73(9)   |
| O(12)-Mn(1)-N(12) | 91.50(7)  | Mn(1)-Mn(4)-Mn(3)   | 78.666(6)  |
| O(11)-Mn(1)-N(12) | 158.86(8) | Mn(2)-Mn(4)-Mn(1)   | 79.487(5)  |
| N(11)-Mn(1)-N(12) | 82.95(8)  | Mn(2)-Mn(4)-Mn(3)   | 79.108(6)  |
|                   |           | C(41)#1-N(41)-Mn(1) | 160.39(19) |

|                     |            |                    |            |
|---------------------|------------|--------------------|------------|
| C(42)-N(42)-Mn(2)   | 159.84(18) | Mn(8)-Mn(5)-Mn(7)  | 50.772(4)  |
| C(43)-N(43)-Mn(3)   | 163.19(19) | Mn(8)-Mn(6)-Mn(5)  | 51.384(4)  |
| N(41)#1-C(41)-Mn(4) | 177.3(2)   | Mn(8)-Mn(6)-Mn(7)  | 50.786(4)  |
| N(42)-C(42)-Mn(4)   | 178.0(2)   | Mn(8)-Mn(7)-Mn(5)  | 51.326(4)  |
| N(43)-C(43)-Mn(4)   | 178.1(2)   | Mn(8)-Mn(7)-Mn(6)  | 50.497(4)  |
| O(52)-Mn(5)-O(51)   | 94.23(7)   | Mn(6)-Mn(5)-Mn(7)  | 60.188(6)  |
| O(52)-Mn(5)-N(51)   | 173.32(7)  | Mn(5)-Mn(6)-Mn(7)  | 59.914(5)  |
| O(51)-Mn(5)-N(51)   | 88.79(7)   | Mn(5)-Mn(7)-Mn(6)  | 59.898(5)  |
| O(52)-Mn(5)-N(52)   | 92.07(7)   | C(45)-O(51)-Mn(5)  | 122.55(14) |
| O(51)-Mn(5)-N(52)   | 163.84(7)  | C(501)-O(52)-Mn(5) | 131.48(14) |
| N(51)-Mn(5)-N(52)   | 83.51(8)   | C(47)-O(61)-Mn(6)  | 122.30(13) |
| O(52)-Mn(5)-N(85)   | 92.03(7)   | C(601)-O(62)-Mn(6) | 131.94(15) |
| O(51)-Mn(5)-N(85)   | 92.66(7)   | C(49)-O(71)-Mn(7)  | 122.76(14) |
| N(51)-Mn(5)-N(85)   | 93.79(7)   | C(701)-O(72)-Mn(7) | 131.33(14) |
| N(52)-Mn(5)-N(85)   | 101.98(8)  | C(86)-Mn(8)-C(85)  | 88.41(9)   |
| O(52)-Mn(5)-O(805)  | 89.37(7)   | C(86)-Mn(8)-C(87)  | 88.59(9)   |
| O(51)-Mn(5)-O(805)  | 83.84(8)   | C(87)-Mn(8)-C(85)  | 88.44(9)   |
| N(51)-Mn(5)-O(805)  | 85.02(7)   | Mn(6)-Mn(8)-Mn(5)  | 78.076(6)  |
| N(52)-Mn(5)-O(805)  | 81.36(8)   | Mn(6)-Mn(8)-Mn(7)  | 78.717(6)  |
| N(85)-Mn(5)-O(805)  | 176.32(8)  | Mn(7)-Mn(8)-Mn(5)  | 77.902(6)  |
| O(62)-Mn(6)-O(61)   | 95.10(7)   | C(85)-N(85)-Mn(5)  | 163.14(19) |
| O(62)-Mn(6)-N(61)   | 174.03(8)  | C(86)-N(86)-Mn(6)  | 162.09(18) |
| O(61)-Mn(6)-N(61)   | 88.50(7)   | C(87)-N(87)-Mn(7)  | 162.41(18) |
| O(62)-Mn(6)-N(62)   | 91.80(7)   | N(85)-C(85)-Mn(8)  | 177.3(2)   |
| O(61)-Mn(6)-N(62)   | 163.61(7)  | N(86)-C(86)-Mn(8)  | 177.2(2)   |
| N(61)-Mn(6)-N(62)   | 83.52(8)   | N(87)-C(87)-Mn(8)  | 177.31(19) |
| O(62)-Mn(6)-N(86)   | 91.79(8)   |                    |            |
| O(61)-Mn(6)-N(86)   | 94.23(7)   |                    |            |
| N(61)-Mn(6)-N(86)   | 92.69(8)   |                    |            |
| N(62)-Mn(6)-N(86)   | 100.40(8)  |                    |            |
| O(62)-Mn(6)-O(806)  | 90.42(8)   |                    |            |
| O(61)-Mn(6)-O(806)  | 83.70(7)   |                    |            |
| N(61)-Mn(6)-O(806)  | 85.24(8)   |                    |            |
| N(62)-Mn(6)-O(806)  | 81.40(8)   |                    |            |
| N(86)-Mn(6)-O(806)  | 177.10(8)  |                    |            |
| O(72)-Mn(7)-O(71)   | 93.67(7)   |                    |            |
| O(72)-Mn(7)-N(71)   | 171.37(8)  |                    |            |
| O(71)-Mn(7)-N(71)   | 89.38(7)   |                    |            |
| O(72)-Mn(7)-N(72)   | 91.91(7)   |                    |            |
| O(71)-Mn(7)-N(72)   | 164.43(7)  |                    |            |
| N(71)-Mn(7)-N(72)   | 83.16(7)   |                    |            |
| O(72)-Mn(7)-N(87)   | 93.88(7)   |                    |            |
| O(71)-Mn(7)-N(87)   | 92.97(7)   |                    |            |
| N(71)-Mn(7)-N(87)   | 94.01(8)   |                    |            |
| N(72)-Mn(7)-N(87)   | 101.15(8)  |                    |            |
| O(72)-Mn(7)-O(807)  | 90.92(7)   |                    |            |
| O(71)-Mn(7)-O(807)  | 83.44(7)   |                    |            |
| N(71)-Mn(7)-O(807)  | 81.40(7)   |                    |            |
| N(72)-Mn(7)-O(807)  | 81.95(7)   |                    |            |
| N(87)-Mn(7)-O(807)  | 174.18(7)  |                    |            |
| Mn(8)-Mn(5)-Mn(6)   | 50.540(5)  |                    |            |

---

Symmetry transformations used to  
generate equivalent atoms:  
#1 -x+1,-y+1,-z+1 #2 -x,-y+2,-z+2



**Table S3.** Selected Interatomic Distances [Å] and Angles [deg] for **3**.

|               |          |                    |            |
|---------------|----------|--------------------|------------|
| Mn(1)-O(11)   | 1.894(2) | C(105)-C(106)      | 1.395(5)   |
| Mn(1)-O(12)   | 1.876(2) | C(201)-C(202)      | 1.421(5)   |
| Mn(1)-N(11)   | 1.987(3) | C(201)-C(206)      | 1.424(5)   |
| Mn(1)-N(12)   | 1.985(3) | C(202)-C(203)      | 1.404(5)   |
| Mn(1)-N(41)   | 2.207(3) | C(203)-C(204)      | 1.382(5)   |
| Mn(1)-O(401)  | 2.350(3) | C(204)-C(205)      | 1.406(5)   |
| Mn(2)-O(21)   | 1.897(2) | C(205)-C(206)      | 1.390(5)   |
| Mn(2)-O(22)   | 1.873(2) | C(301)-C(302)      | 1.410(5)   |
| Mn(2)-N(21)   | 1.983(3) | C(301)-C(306)      | 1.426(5)   |
| Mn(2)-N(22)   | 1.981(3) | C(302)-C(303)      | 1.421(5)   |
| Mn(2)-N(42)   | 2.213(3) | C(303)-C(304)      | 1.370(5)   |
| Mn(2)-O(402)  | 2.350(3) | C(304)-C(305)      | 1.400(5)   |
| Mn(3)-O(31)   | 1.887(2) | C(305)-C(306)      | 1.396(5)   |
| Mn(3)-O(32)   | 1.874(2) | Mn(1)-Mn(2)        | 6.8588(7)  |
| Mn(3)-N(31)   | 1.981(3) | Mn(1)-Mn(3)        | 6.7944(7)  |
| Mn(3)-N(32)   | 1.979(3) | Mn(2)-Mn(3)        | 6.8240(7)  |
| Mn(3)-N(43)   | 2.200(3) | Mn(1)-Mn(4)        | 5.2945(5)  |
| Mn(3)-O(403)  | 2.400(3) | Mn(2)-Mn(4)        | 5.2836(5)  |
| O(11)-C(1)    | 1.305(4) | Mn(3)-Mn(4)        | 5.2679(5)  |
| O(12)-C(101)  | 1.327(4) | Mn(4)-C(41)        | 1.993(3)   |
| O(21)-C(3)    | 1.308(4) | Mn(4)-C(42)        | 1.992(3)   |
| O(22)-C(201)  | 1.315(4) | Mn(4)-C(43)        | 1.988(3)   |
| O(31)-C(5)    | 1.316(4) | N(41)-C(41)        | 1.148(4)   |
| O(32)-C(301)  | 1.327(4) | N(42)-C(42)        | 1.148(4)   |
| N(11)-C(11)   | 1.301(4) | N(43)-C(43)        | 1.148(4)   |
| N(12)-C(17)   | 1.282(5) | O(12)-Mn(1)-O(11)  | 96.07(10)  |
| N(21)-C(21)   | 1.293(4) | O(12)-Mn(1)-N(12)  | 91.96(11)  |
| N(22)-C(27)   | 1.282(5) | O(11)-Mn(1)-N(12)  | 169.25(11) |
| N(31)-C(31)   | 1.304(4) | O(12)-Mn(1)-N(11)  | 171.70(11) |
| N(32)-C(37)   | 1.295(4) | O(11)-Mn(1)-N(11)  | 88.16(10)  |
| C(1)-C(2)     | 1.423(4) | N(12)-Mn(1)-N(11)  | 83.01(12)  |
| C(1)-C(6)     | 1.436(4) | O(12)-Mn(1)-N(41)  | 95.26(11)  |
| C(2)-C(3)     | 1.426(4) | O(11)-Mn(1)-N(41)  | 90.34(11)  |
| C(3)-C(4)     | 1.423(4) | N(12)-Mn(1)-N(41)  | 96.04(12)  |
| C(4)-C(5)     | 1.418(4) | N(11)-Mn(1)-N(41)  | 91.85(12)  |
| C(5)-C(6)     | 1.414(4) | O(12)-Mn(1)-O(401) | 86.81(11)  |
| C(2)-C(11)    | 1.472(4) | O(11)-Mn(1)-O(401) | 87.76(10)  |
| C(17)-C(102)  | 1.437(5) | N(12)-Mn(1)-O(401) | 85.56(12)  |
| C(4)-C(21)    | 1.464(4) | N(11)-Mn(1)-O(401) | 86.22(11)  |
| C(27)-C(202)  | 1.436(5) | N(41)-Mn(1)-O(401) | 177.33(11) |
| C(6)-C(31)    | 1.458(5) | O(22)-Mn(2)-O(21)  | 96.12(10)  |
| C(37)-C(302)  | 1.435(5) | O(22)-Mn(2)-N(22)  | 91.27(11)  |
| C(101)-C(102) | 1.418(5) | O(21)-Mn(2)-N(22)  | 169.94(11) |
| C(101)-C(106) | 1.430(5) | O(22)-Mn(2)-N(21)  | 172.03(11) |
| C(102)-C(103) | 1.409(5) | O(21)-Mn(2)-N(21)  | 89.06(11)  |
| C(103)-C(104) | 1.369(6) | N(22)-Mn(2)-N(21)  | 82.90(12)  |
| C(104)-C(105) | 1.399(6) | O(22)-Mn(2)-N(42)  | 94.83(11)  |
|               |          | O(21)-Mn(2)-N(42)  | 89.22(11)  |
|               |          | N(22)-Mn(2)-N(42)  | 96.97(12)  |
|               |          | N(21)-Mn(2)-N(42)  | 91.28(11)  |

|                    |            |
|--------------------|------------|
| O(22)-Mn(2)-O(402) | 89.84(11)  |
| O(21)-Mn(2)-O(402) | 84.72(10)  |
| N(22)-Mn(2)-O(402) | 88.50(11)  |
| N(21)-Mn(2)-O(402) | 84.60(11)  |
| N(42)-Mn(2)-O(402) | 172.72(11) |
| O(32)-Mn(3)-O(31)  | 96.10(10)  |
| O(32)-Mn(3)-N(32)  | 91.77(11)  |
| O(31)-Mn(3)-N(32)  | 168.52(11) |
| O(32)-Mn(3)-N(31)  | 170.68(11) |
| O(31)-Mn(3)-N(31)  | 87.97(11)  |
| N(32)-Mn(3)-N(31)  | 83.06(11)  |
| O(32)-Mn(3)-N(43)  | 94.47(11)  |
| O(31)-Mn(3)-N(43)  | 90.06(11)  |
| N(32)-Mn(3)-N(43)  | 97.66(12)  |
| N(31)-Mn(3)-N(43)  | 93.90(11)  |
| O(32)-Mn(3)-O(403) | 85.81(11)  |
| O(31)-Mn(3)-O(403) | 86.39(10)  |
| N(32)-Mn(3)-O(403) | 85.86(11)  |
| N(31)-Mn(3)-O(403) | 86.09(11)  |
| N(43)-Mn(3)-O(403) | 176.46(11) |
| Mn(4)-Mn(1)-Mn(2)  | 49.510(6)  |
| Mn(4)-Mn(1)-Mn(3)  | 49.793(6)  |
| Mn(4)-Mn(2)-Mn(1)  | 49.648(6)  |
| Mn(4)-Mn(2)-Mn(3)  | 49.604(6)  |
| Mn(4)-Mn(3)-Mn(1)  | 50.136(6)  |
| Mn(4)-Mn(3)-Mn(2)  | 49.805(6)  |
| Mn(3)-Mn(1)-Mn(2)  | 59.973(7)  |
| Mn(3)-Mn(2)-Mn(1)  | 59.546(7)  |
| Mn(1)-Mn(3)-Mn(2)  | 60.482(7)  |
| C(1)-O(11)-Mn(1)   | 123.7(2)   |
| C(101)-O(12)-Mn(1) | 130.9(2)   |
| C(3)-O(21)-Mn(2)   | 124.99(19) |
| C(201)-O(22)-Mn(2) | 131.3(2)   |
| C(5)-O(31)-Mn(3)   | 124.52(19) |
| C(301)-O(32)-Mn(3) | 131.3(2)   |
| C(42)-Mn(4)-C(41)  | 91.32(13)  |
| C(43)-Mn(4)-C(41)  | 90.04(13)  |
| C(43)-Mn(4)-C(42)  | 91.47(13)  |
| Mn(2)-Mn(4)-Mn(1)  | 80.841(8)  |
| Mn(3)-Mn(4)-Mn(1)  | 80.071(7)  |
| Mn(3)-Mn(4)-Mn(2)  | 80.591(8)  |
| C(41)-N(41)-Mn(1)  | 163.3(3)   |
| C(42)-N(42)-Mn(2)  | 160.5(3)   |
| C(43)-N(43)-Mn(3)  | 161.2(3)   |
| N(41)-C(41)-Mn(4)  | 179.6(3)   |
| N(42)-C(42)-Mn(4)  | 178.8(3)   |
| N(43)-C(43)-Mn(4)  | 178.7(3)   |

Symmetry transformations used to  
generate equivalent atoms:  
#1 -x+1,-y+1,-z+2

**Table S4.** Selected Interatomic Distances [Å] and Angles [deg] for **4**.

|               |            |                    |           |
|---------------|------------|--------------------|-----------|
| Mn(1)-O(11)   | 1.8890(18) | C(105)-C(106)      | 1.396(4)  |
| Mn(1)-O(12)   | 1.8760(19) | C(201)-C(202)      | 1.421(4)  |
| Mn(1)-N(11)   | 1.985(2)   | C(201)-C(206)      | 1.423(4)  |
| Mn(1)-N(12)   | 1.981(2)   | C(202)-C(203)      | 1.415(4)  |
| Mn(1)-N(41)   | 2.199(2)   | C(203)-C(204)      | 1.371(4)  |
| Mn(1)-O(401)  | 2.366(2)   | C(204)-C(205)      | 1.406(4)  |
| Mn(2)-O(21)   | 1.8948(18) | C(205)-C(206)      | 1.389(4)  |
| Mn(2)-O(22)   | 1.8721(18) | C(301)-C(302)      | 1.421(4)  |
| Mn(2)-N(21)   | 1.979(2)   | C(301)-C(306)      | 1.423(4)  |
| Mn(2)-N(22)   | 1.982(2)   | C(302)-C(303)      | 1.411(4)  |
| Mn(2)-N(42)   | 2.204(2)   | C(303)-C(304)      | 1.375(4)  |
| Mn(2)-O(402)  | 2.338(2)   | C(304)-C(305)      | 1.401(4)  |
| Mn(3)-O(31)   | 1.8905(18) | C(305)-C(306)      | 1.391(4)  |
| Mn(3)-O(32)   | 1.8751(18) | Mn(1)-Mn(2)        | 6.8535(6) |
| Mn(3)-N(31)   | 1.982(2)   | Mn(1)-Mn(3)        | 6.7926(6) |
| Mn(3)-N(32)   | 1.980(2)   | Mn(2)-Mn(3)        | 6.8217(6) |
| Mn(3)-N(43)   | 2.205(2)   | Mn(1)-Mn(4)        | 5.2860(5) |
| Mn(3)-O(403)  | 2.380(2)   | Mn(2)-Mn(4)        | 5.2758(4) |
| O(11)-C(1)    | 1.312(3)   | Mn(3)-Mn(4)        | 5.2847(4) |
| O(12)-C(101)  | 1.325(3)   | Mn(4)-C(41)        | 1.991(3)  |
| O(21)-C(3)    | 1.314(3)   | Mn(4)-C(42)        | 1.991(3)  |
| O(22)-C(201)  | 1.318(3)   | Mn(4)-C(43)        | 1.995(3)  |
| O(31)-C(5)    | 1.309(3)   | N(41)-C(41)        | 1.151(4)  |
| O(32)-C(301)  | 1.318(3)   | N(42)-C(42)        | 1.149(4)  |
| N(11)-C(11)   | 1.307(3)   | N(43)-C(43)        | 1.152(3)  |
| N(12)-C(17)   | 1.289(4)   | O(12)-Mn(1)-O(11)  | 96.10(8)  |
| N(21)-C(21)   | 1.305(3)   | O(12)-Mn(1)-N(12)  | 91.88(9)  |
| N(22)-C(27)   | 1.287(4)   | O(11)-Mn(1)-N(12)  | 169.22(9) |
| N(31)-C(31)   | 1.300(3)   | O(12)-Mn(1)-N(11)  | 171.48(9) |
| N(32)-C(37)   | 1.289(4)   | O(11)-Mn(1)-N(11)  | 88.20(8)  |
| C(1)-C(6)     | 1.426(3)   | N(12)-Mn(1)-N(11)  | 82.99(9)  |
| C(1)-C(2)     | 1.426(3)   | O(12)-Mn(1)-N(41)  | 95.29(9)  |
| C(2)-C(3)     | 1.426(3)   | O(11)-Mn(1)-N(41)  | 90.75(9)  |
| C(3)-C(4)     | 1.418(3)   | N(12)-Mn(1)-N(41)  | 95.74(9)  |
| C(4)-C(5)     | 1.430(3)   | N(11)-Mn(1)-N(41)  | 92.00(9)  |
| C(5)-C(6)     | 1.415(3)   | O(12)-Mn(1)-O(401) | 86.12(9)  |
| C(2)-C(11)    | 1.459(3)   | O(11)-Mn(1)-O(401) | 87.02(9)  |
| C(17)-C(102)  | 1.436(4)   | N(12)-Mn(1)-O(401) | 86.29(10) |
| C(4)-C(21)    | 1.460(3)   | N(11)-Mn(1)-O(401) | 86.76(9)  |
| C(27)-C(202)  | 1.428(4)   | N(41)-Mn(1)-O(401) | 177.49(9) |
| C(6)-C(31)    | 1.466(3)   | O(22)-Mn(2)-O(21)  | 95.90(8)  |
| C(37)-C(302)  | 1.441(4)   | O(22)-Mn(2)-N(21)  | 171.77(9) |
| C(101)-C(102) | 1.418(4)   | O(21)-Mn(2)-N(21)  | 89.22(8)  |
| C(101)-C(106) | 1.423(4)   | O(22)-Mn(2)-N(22)  | 91.29(9)  |
| C(102)-C(103) | 1.409(4)   | O(21)-Mn(2)-N(22)  | 170.05(9) |
| C(103)-C(104) | 1.375(4)   | N(21)-Mn(2)-N(22)  | 82.90(9)  |
| C(104)-C(105) | 1.394(4)   | O(22)-Mn(2)-N(42)  | 94.62(9)  |
|               |            | O(21)-Mn(2)-N(42)  | 89.53(9)  |
|               |            | N(21)-Mn(2)-N(42)  | 91.86(9)  |
|               |            | N(22)-Mn(2)-N(42)  | 96.75(10) |

|                    |            |
|--------------------|------------|
| O(22)-Mn(2)-O(402) | 89.25(9)   |
| O(21)-Mn(2)-O(402) | 84.63(8)   |
| N(21)-Mn(2)-O(402) | 84.81(9)   |
| N(22)-Mn(2)-O(402) | 88.61(9)   |
| N(42)-Mn(2)-O(402) | 173.31(9)  |
| O(32)-Mn(3)-O(31)  | 96.13(8)   |
| O(32)-Mn(3)-N(32)  | 91.54(9)   |
| O(31)-Mn(3)-N(32)  | 168.65(9)  |
| O(32)-Mn(3)-N(31)  | 171.05(9)  |
| O(31)-Mn(3)-N(31)  | 88.02(8)   |
| N(32)-Mn(3)-N(31)  | 83.27(9)   |
| O(32)-Mn(3)-N(43)  | 94.58(9)   |
| O(31)-Mn(3)-N(43)  | 89.81(8)   |
| N(32)-Mn(3)-N(43)  | 97.93(9)   |
| N(31)-Mn(3)-N(43)  | 93.36(9)   |
| O(32)-Mn(3)-O(403) | 86.72(8)   |
| O(31)-Mn(3)-O(403) | 86.94(8)   |
| N(32)-Mn(3)-O(403) | 85.15(9)   |
| N(31)-Mn(3)-O(403) | 85.58(8)   |
| N(43)-Mn(3)-O(403) | 176.61(8)  |
| Mn(4)-Mn(1)-Mn(2)  | 49.477(5)  |
| Mn(4)-Mn(1)-Mn(3)  | 50.006(5)  |
| Mn(4)-Mn(2)-Mn(1)  | 49.607(6)  |
| Mn(4)-Mn(2)-Mn(3)  | 49.819(5)  |
| Mn(4)-Mn(3)-Mn(1)  | 50.023(5)  |
| Mn(4)-Mn(3)-Mn(2)  | 49.705(6)  |
| Mn(3)-Mn(1)-Mn(2)  | 59.985(6)  |
| Mn(3)-Mn(2)-Mn(1)  | 59.564(6)  |
| Mn(1)-Mn(3)-Mn(2)  | 60.450(6)  |
| C(1)-O(11)-Mn(1)   | 123.60(16) |
| C(101)-O(12)-Mn(1) | 131.12(17) |
| C(3)-O(21)-Mn(2)   | 124.67(16) |
| C(201)-O(22)-Mn(2) | 131.28(17) |
| C(5)-O(31)-Mn(3)   | 124.53(15) |
| C(301)-O(32)-Mn(3) | 131.63(17) |
| C(41)-Mn(4)-C(43)  | 89.99(11)  |
| C(42)-Mn(4)-C(41)  | 91.54(11)  |
| C(42)-Mn(4)-C(43)  | 91.43(11)  |
| Mn(2)-Mn(4)-Mn(1)  | 80.917(7)  |
| Mn(2)-Mn(4)-Mn(3)  | 80.477(6)  |
| Mn(3)-Mn(4)-Mn(1)  | 79.970(6)  |
| C(41)-N(41)-Mn(1)  | 163.0(2)   |
| C(42)-N(42)-Mn(2)  | 160.5(2)   |
| C(43)-N(43)-Mn(3)  | 161.5(2)   |
| N(41)-C(41)-Mn(4)  | 179.8(3)   |
| N(42)-C(42)-Mn(4)  | 178.5(3)   |
| N(43)-C(43)-Mn(4)  | 178.8(3)   |

Symmetry transformations used to  
generate equivalent atoms:  
#1 -x+1,-y+1,-z+2 #2 -x+1,-y,-z+2

**Table S5.** Selected Interatomic Distances [Å] and Angles [deg] for **5**.

|                     |            |
|---------------------|------------|
| Mn(1)-O(11)         | 1.894(2)   |
| Mn(1)-O(12)         | 1.887(2)   |
| Mn(1)-N(11)         | 1.975(3)   |
| Mn(1)-N(12)         | 1.990(3)   |
| Mn(1)-N(41)         | 2.169(3)   |
| Mn(1)-O(401)        | 2.302(3)   |
| O(11)-C(1)          | 1.307(4)   |
| O(12)-C(101)        | 1.320(4)   |
| N(11)-C(11)         | 1.296(4)   |
| N(12)-C(17)         | 1.276(5)   |
| C(1)-C(2)           | 1.428(5)   |
| C(1)-C(2)#2         | 1.416(5)   |
| C(2)-C(11)          | 1.451(5)   |
| C(17)-C(102)        | 1.431(5)   |
| C(101)-C(102)       | 1.416(5)   |
| C(101)-C(106)       | 1.422(5)   |
| C(102)-C(103)       | 1.400(5)   |
| C(103)-C(104)       | 1.362(6)   |
| C(104)-C(105)       | 1.428(6)   |
| C(105)-C(106)       | 1.380(5)   |
| Mn(1)-Mn(1)#1       | 6.8508(9)  |
| Mn(1)-Mn(2)         | 5.1997(5)  |
| Mn(2)-C(41)         | 1.978(4)   |
| N(41)-C(41)         | 1.147(4)   |
| O(12)-Mn(1)-O(11)   | 97.42(10)  |
| O(12)-Mn(1)-N(11)   | 171.49(11) |
| O(11)-Mn(1)-N(11)   | 87.62(11)  |
| O(12)-Mn(1)-N(12)   | 91.36(11)  |
| O(11)-Mn(1)-N(12)   | 170.28(11) |
| N(11)-Mn(1)-N(12)   | 83.17(12)  |
| O(12)-Mn(1)-N(41)   | 93.21(10)  |
| O(11)-Mn(1)-N(41)   | 88.59(10)  |
| N(11)-Mn(1)-N(41)   | 93.76(11)  |
| N(12)-Mn(1)-N(41)   | 95.11(12)  |
| O(12)-Mn(1)-O(401)  | 87.92(11)  |
| O(11)-Mn(1)-O(401)  | 88.53(10)  |
| N(11)-Mn(1)-O(401)  | 85.36(11)  |
| N(12)-Mn(1)-O(401)  | 87.61(12)  |
| N(41)-Mn(1)-O(401)  | 177.03(11) |
| Mn(2)-Mn(1)-Mn(1)#1 | 48.794(4)  |
| C(1)-O(11)-Mn(1)    | 125.0(2)   |
| C(101)-O(12)-Mn(1)  | 130.8(2)   |
| C(41)-Mn(2)-C(41)#1 | 92.68(12)  |
| C(41)-N(41)-Mn(1)   | 156.3(3)   |
| N(41)-C(41)-Mn(2)   | 176.2(3)   |

Symmetry transformations used to generate equivalent atoms: #1  $-y+3/4, -z+5/4, x+1/2$  #2  $z-1/2, -x+3/4, -y+5/4$  #3  $-x+1/2, -y+1, -z+3/2$  #4  $-z+1, x+1/4, y+1/4$  #5  $y-1/4, z-1/4, -x+1$
